# Supplementary material for: Investigating the influence of eco-friendly approaches on saline soil traits and growth of common bean plants (Phaseolus vulgaris L.)
Source: PeerJ. 2024 Aug 28;12:e17828. doi: 10.7717/peerj.17828 (PMC11365486; doi:10.7717/peerj.17828)
Supplement: Data S1 [file peerj-12-17828-s001.xlsx]

## Sheet: Sheet1
Season		2022						Season		2023
parameters	Treatment	Df	Sum Sq	Mean Sq	F value	Pr(>F)		parameters	Treatment	Df	Sum Sq	Mean Sq	F value	Pr(>F)
SWC	Mulching	3	322.4	107.46	64.993 1	.05e-13 ***		SWC	Mulching	3	350.3	116.78	27.487	5.52e-09 ***
	Chitosan.foliar.spray	3	2.6	0.87	0.527	0.667			Chitosan.foliar.spray	3	3.3	1.09	0.257	0.856
	Mulching:Chitosan.foliar.spray	9	0.4	0.05	0.029	1			Mulching:Chitosan.foliar.spray	9	0.5	0.05	0.012	1
	Residuals	30	39.1348	1.30449					Residuals	30	111.985	3.73284
	Signif. codes: 0 ‘***’ 0.001 ‘**’ 0.01 ‘*’ 0.05 ‘.’ 0.1 ‘ ’ 1								Signif. codes: 0 ‘***’ 0.001 ‘**’ 0.01 ‘*’ 0.05 ‘.’ 0.1 ‘ ’ 1
	---								---
EC	Mulching	3	2.3477	0.7826	30.072 1	.96e-09 ***		EC	Mulching	3	5.847	1.9489	116.891	< 2e-16 ***
	Chitosan.foliar.spray	3	0.4488	0.1496	5.748	0.00291 **			Chitosan.foliar.spray	3	0.354	0.1181	7.084	0.000879 ***
	Mulching:Chitosan.foliar.spray	9	0.0285354	0.0031706	2.81542	0.0294*			Mulching:Chitosan.foliar.spray	9	0.029	0.0032	0.192	0.993517
	Residuals	30	0.151846	0.0050615					Residuals	30	0.500204	0.0166735
	Signif. codes: 0 ‘***’ 0.001 ‘**’ 0.01 ‘*’ 0.05 ‘.’ 0.1 ‘ ’ 1								Signif. codes: 0 ‘***’ 0.001 ‘**’ 0.01 ‘*’ 0.05 ‘.’ 0.1 ‘ ’ 1
	---								---
SOC	Mulching	3	0.16909	0.05636	81.08	4.86e-15 ***		SOC	Mulching	3	0.23551	0.0785	66.08	8.34e-14 ***
	Chitosan.foliar.spray	3	0.00600561	0.0020019	6.34745	0.0272*			Chitosan.foliar.spray	3	0.01575	0.00525	4.42	0.0104 *
	Mulching:Chitosan.foliar.spray	9	0.0032	0.00036	0.511	0.8554			Mulching:Chitosan.foliar.spray	9	0.00545	0.00061	0.51	0.8566
	Residuals	30	0.0215994	0.00071998					Residuals	30	0.0352255	0.0011742
	Signif. codes: 0 ‘***’ 0.001 ‘**’ 0.01 ‘*’ 0.05 ‘.’ 0.1 ‘ ’ 1								Signif. codes: 0 ‘***’ 0.001 ‘**’ 0.01 ‘*’ 0.05 ‘.’ 0.1 ‘ ’ 1
	---								---
Av.N	Mulching	3	607	202.33	58.669 4	.2e-13 ***		Av.N	Mulching	3	657.1	219.03	56.508	6.96e-13 ***
	Chitosan.foliar.spray	3	12.1	4.02	1.167	0.338			Chitosan.foliar.spray	3	17.6844	5.89481	9.66323	0.0103*
	Mulching:Chitosan.foliar.spray	9	0.2	0.02	0.005	1			Mulching:Chitosan.foliar.spray	9	24.4	2.72	0.701	0.704
	Residuals	30	98.8377	3.29459					Residuals	30	83.478	2.7826
	Signif. codes: 0 ‘***’ 0.001 ‘**’ 0.01 ‘*’ 0.05 ‘.’ 0.1 ‘ ’ 1								Signif. codes: 0 ‘***’ 0.001 ‘**’ 0.01 ‘*’ 0.05 ‘.’ 0.1 ‘ ’ 1
	---								---
Av.P	Mulching	3	147.4	49.13	47.109 7	.65e-12 ***		Av.P	Mulching	3	135.76	45.25	50.21	3.33e-12 ***
	Chitosan.foliar.spray	3	4.04	1.35	1.292	0.294			Chitosan.foliar.spray	3	6.8	2.27	2.513	0.0761 .
	Mulching:Chitosan.foliar.spray	9	0.22	0.02	0.023	1			Mulching:Chitosan.foliar.spray	9	1.67	0.19	0.206	0.9915
	Residuals	30	30.3519	1.01173					Residuals	30	26.9813	0.899378
	Signif. codes: 0 ‘***’ 0.001 ‘**’ 0.01 ‘*’ 0.05 ‘.’ 0.1 ‘ ’ 1								Signif. codes: 0 ‘***’ 0.001 ‘**’ 0.01 ‘*’ 0.05 ‘.’ 0.1 ‘ ’ 1
	---								---
Av.K	Mulching	3	45554	15185 8	62.680 <	2e-16 ***		Av.K	Mulching	3	47293	15764	1156.48	0 <2e-16 ***
	Chitosan.foliar.spray	3	11	4	0.203	0.894			Chitosan.foliar.spray	3	18	6	0.446	0.722
	Mulching:Chitosan.foliar.spray	9	5	1	0.031	1			Mulching:Chitosan.foliar.spray	9	5	1	0.037	1
	Residuals	30	513.161	17.1054					Residuals	30	434.337	14.4779
	Signif. codes: 0 ‘***’ 0.001 ‘**’ 0.01 ‘*’ 0.05 ‘.’ 0.1 ‘ ’ 1								Signif. codes: 0 ‘***’ 0.001 ‘**’ 0.01 ‘*’ 0.05 ‘.’ 0.1 ‘ ’ 1
	---								---
BC	Mulching	3	27.588	9.196 4	73.153	< 2e-16 ***		BC	Mulching	3	34.76	11.586	18.26	4.36e-07 ***
	Chitosan.foliar.spray	3	3.379	1.126	57.953 4	.96e-13 ***			Chitosan.foliar.spray	3	6.22	2.073	3.267	0.0339 *
	Mulching:Chitosan.foliar.spray	9	0.507	0.056	2.898	0.0126 *			Mulching:Chitosan.foliar.spray	9	2.11	0.234	0.37	0.9412
	Residuals	30	0.580429	0.0193476					Residuals	30	17.9159	0.597196
	Signif. codes: 0 ‘***’ 0.001 ‘**’ 0.01 ‘*’ 0.05 ‘.’ 0.1 ‘ ’ 1								Signif. codes: 0 ‘***’ 0.001 ‘**’ 0.01 ‘*’ 0.05 ‘.’ 0.1 ‘ ’ 1
	---								---
FC	Mulching	3	8.953	2.9844	4.863 0	.00673 **		FC	Mulching	3	23.724	7.908	13.761	6.19e-06 ***
	Chitosan.foliar.spray	3	2.411	0.8037	1.310 0	0.28828			Chitosan.foliar.spray	3	4.495	1.498	19.9102	0.0016**
	Mulching:Chitosan.foliar.spray	9	0.072	0.008	0.013 1	0			Mulching:Chitosan.foliar.spray	9	0.334	0.037	0.065	0.9999
	Residuals	30	15.6626	0.522087					Residuals	30	16.7241	0.55747
	Signif. codes: 0 ‘***’ 0.001 ‘**’ 0.01 ‘*’ 0.05 ‘.’ 0.1 ‘ ’ 1								Signif. codes: 0 ‘***’ 0.001 ‘**’ 0.01 ‘*’ 0.05 ‘.’ 0.1 ‘ ’ 1
	---								---
Plant height	Mulching	3	120.72	40.24	59.56 3	.43e-13 ***		Plant height	Mulching	3	143.97	47.99	80.233	5.63e-15 ***
	Chitosan.foliar.spray	3	207.52	69.17	102.38	< 2e-16 ***			Chitosan.foliar.spray	3	213.04	71.01	118.725	< 2e-16 ***
	Mulching:Chitosan.foliar.spray	9	1.82521	0.2	0.3	0.969			Mulching:Chitosan.foliar.spray	9	2.53521	0.28	0.471	0.883
	Residuals	30	4.125	0.1375					Residuals	30	3.43708	0.114569
	Signif. codes: 0 ‘***’ 0.001 ‘**’ 0.01 ‘*’ 0.05 ‘.’ 0.1 ‘ ’ 1								Signif. codes: 0 ‘***’ 0.001 ‘**’ 0.01 ‘*’ 0.05 ‘.’ 0.1 ‘ ’ 1
	---								---
Chlorophyll	Mulching	3	270.6	90.21	55.462 8	.93e-13 ***		Chlorophyll	Mulching	3	304.9	101.65	73.697	1.85e-14 ***
	Chitosan.foliar.spray	3	378.9	126.29	77.644 8	.92e-15 ***			Chitosan.foliar.spray	3	404.4	134.82	97.744	3.39e-16 ***
	Mulching:Chitosan.foliar.spray	9	11.7	1.3	0.802	0.617			Mulching:Chitosan.foliar.spray	9	9.4	1.04	0.756	0.657
	Residuals	30	31.3088	1.04363					Residuals	30	28.213	0.940434
	Signif. codes: 0 ‘***’ 0.001 ‘**’ 0.01 ‘*’ 0.05 ‘.’ 0.1 ‘ ’ 1								Signif. codes: 0 ‘***’ 0.001 ‘**’ 0.01 ‘*’ 0.05 ‘.’ 0.1 ‘ ’ 1
	---								---
Shoot.FW	Mulching	3	248.48	82.83 1	27.131 <	2e-16 ***		Shoot.FW	Mulching	3	300.49	100.16	82.256	3.96e-15 ***
	Chitosan.foliar.spray	3	262.52	87.51 1	34.316 <	2e-16 ***			Chitosan.foliar.spray	3	290.01	96.67	79.387	6.53e-15 ***
	Mulching:Chitosan.foliar.spray	9	0.79	0.09	0.135	0.998			Mulching:Chitosan.foliar.spray	9	0.83	0.09	0.076	1
	Residuals	30	4.51768	0.150589					Residuals	30	23.3897	0.779657
	Signif. codes: 0 ‘***’ 0.001 ‘**’ 0.01 ‘*’ 0.05 ‘.’ 0.1 ‘ ’ 1								Signif. codes: 0 ‘***’ 0.001 ‘**’ 0.01 ‘*’ 0.05 ‘.’ 0.1 ‘ ’ 1
	---								---
Root.FW	Mulching	3	50.61	16.868	67.406 6	.35e-14 ***		Root.FW	Mulching	3	84	28	109.539	<2e-16 ***
	Chitosan.foliar.spray	3	83.3	27.767 1	10.956	< 2e-16 ***			Chitosan.foliar.spray	3	99.9	33.3	130.269	<2e-16 ***
	Mulching:Chitosan.foliar.spray	9	0.39	0.043	0.172	0.996			Mulching:Chitosan.foliar.spray	9	0.57	0.06	0.246	0.984
	Residuals	30	6.2513	0.208376					Residuals	30	6.90425	0.230142
	Signif. codes: 0 ‘***’ 0.001 ‘**’ 0.01 ‘*’ 0.05 ‘.’ 0.1 ‘ ’ 1								Signif. codes: 0 ‘***’ 0.001 ‘**’ 0.01 ‘*’ 0.05 ‘.’ 0.1 ‘ ’ 1
	---								---
Seed.yield	Mulching	3	2643664	881221	153.349	< 2e-16 ***		Seed.yield	Mulching	3	268207	89402	3 154.76	<2e-16 ***
	Chitosan.foliar.spray	3	1660050	553350	96.293	4.21e-16 ***			Chitosan.foliar.spray	3	179969	59989	7 103.846	<2e-16 ***
	Mulching:Chitosan.foliar.spray	9	1166	130	0.023	1			Mulching:Chitosan.foliar.spray	9	483	53	7 0.093	1
	Residuals	30	156472	5215.74					Residuals	30	158889	5296.29
	Signif. codes: 0 ‘***’ 0.001 ‘**’ 0.01 ‘*’ 0.05 ‘.’ 0.1 ‘ ’ 1								Signif. codes: 0 ‘***’ 0.001 ‘**’ 0.01 ‘*’ 0.05 ‘.’ 0.1 ‘ ’ 1
	---								---
N.precentage	Mulching	3	5.235	1.7451 2	14.961 <	2e-16 ***		N.precentage	Mulching	3	5.642	1.8807	198.757	< 2e-16 ***
	Chitosan.foliar.spray	3	4.157	1.3858 1	70.700 <	2e-16 ***			Chitosan.foliar.spray	3	1.992	0.6641	70.18	3.64e-14 ***
	Mulching:Chitosan.foliar.spray	9	0.151148	0.0167942	14.9182	0***			Mulching:Chitosan.foliar.spray	9	0.525	0.0584	6.168	5.21e-05 ***
	Residuals	30	0.0315515	0.0010517					Residuals	30	0.0467724	0.0015591
	Signif. codes: 0 ‘***’ 0.001 ‘**’ 0.01 ‘*’ 0.05 ‘.’ 0.1 ‘ ’ 1								Signif. codes: 0 ‘***’ 0.001 ‘**’ 0.01 ‘*’ 0.05 ‘.’ 0.1 ‘ ’ 1
	---								---
P.precentage	Mulching	3	0.3241 0	0.10804	286.87 <	2e-16 ***		P.precentage	Mulching	3	0.3755	0.12515	351.802	< 2e-16 ***
	Chitosan.foliar.spray	3	0.4728 0	0.15759	418.45 <	2e-16 ***			Chitosan.foliar.spray	3	0.6011	0.20036	563.224	< 2e-16 ***
	Mulching:Chitosan.foliar.spray	9	0.0085 0	0.00095	2.51 0	.0267 *			Mulching:Chitosan.foliar.spray	9	0.0128	0.00142	3.984	0.00172 **
	Residuals	30	0.0016938	5.646e-05					Residuals	30	0.00122649	4.0883e-05
	Signif. codes: 0 ‘***’ 0.001 ‘**’ 0.01 ‘*’ 0.05 ‘.’ 0.1 ‘ ’ 1								Signif. codes: 0 ‘***’ 0.001 ‘**’ 0.01 ‘*’ 0.05 ‘.’ 0.1 ‘ ’ 1
	---								---
K.precentage	Mulching	3	5.754	1.9180 3	73.29	< 2e-16 ***		K.precentage	Mulching	3	7.524	2.5079	342.424	< 2e-16 ***
	Chitosan.foliar.spray	3	3.579	1.1930 2	32.193	< 2e-16 ***			Chitosan.foliar.spray	3	2.407	0.8022	109.532	< 2e-16 ***
	Mulching:Chitosan.foliar.spray	9	0.224	0.0248	4.835 0	.000407 ***			Mulching:Chitosan.foliar.spray	9	0.317	0.0352	4.804	0.000428 ***
	Residuals	30	0.0133503	0.00044501					Residuals	30	0.020744	0.00069147
	Signif. codes: 0 ‘***’ 0.001 ‘**’ 0.01 ‘*’ 0.05 ‘.’ 0.1 ‘ ’ 1								Signif. codes: 0 ‘***’ 0.001 ‘**’ 0.01 ‘*’ 0.05 ‘.’ 0.1 ‘ ’ 1
	---								---
Na.precentage	Mulching	3	0.10022	0.03341	80.037	5.83e-15 ***		Na.precentage	Mulching	3	0.11316	0.03772	97.395	3.57e-16 ***
	Chitosan.foliar.spray	3	0.27439	0.09146	219.123	< 2e-16 ***			Chitosan.foliar.spray	3	0.28099	0.09366	241.846	< 2e-16 ***
	Mulching:Chitosan.foliar.spray	9	0.02698	0.003	7.183	1.26e-05 ***			Mulching:Chitosan.foliar.spray	9	0.02744	0.0035	7.872	5.11e-06 ***
	Residuals	30	0.00937957	0.00031265					Residuals	30	0.00931652	0.00031055
	Signif. codes: 0 ‘***’ 0.001 ‘**’ 0.01 ‘*’ 0.05 ‘.’ 0.1 ‘ ’ 1								Signif. codes: 0 ‘***’ 0.001 ‘**’ 0.01 ‘*’ 0.05 ‘.’ 0.1 ‘ ’ 1

## Sheet: Sheet2
Soil parameters	EC		S.O.C		AV. N		AV. P		AV. K		SWC		TBC		TFC		Chlorophyll		Ph (cm)		Shoot FW (g)		Root FW (g)		SY (kg ha-1)		N (%)		P (%)		K (%)		Na (%)
Seasons	1st	2nd	1st	2nd	1st	2nd	1st	2nd	1st	2nd	1st	2nd	1st	2nd	1st	2nd	1st	2nd	1st	2nd	1st	2nd	1st	2nd	1st	2nd	1st	2nd	1st	2nd	1st	2nd	1st	2nd
Mulching materials
UNM	7.77a	7.60a	0.598d	0.602d	27.26c	27.56c	12.57b	12.38c	201.19d	201.34d	27.14c	27.89b	5.92d	5.96c	3.61a	3.31a	40.84b	41.29c	24.81b	24.91c	29.58c	30.25c	8.58c	8.88d	1450.44b	1481.24b	2.65d	2.76d	0.461d	0.525d	2.06c	2.09d	0.458a	0.435a
WPM	7.15c	6.63d	0.643c	0.660c	33.61b	34.60b	13.68b	14.19b	256.36c	257.31c	33.54a	34.13a	6.96c	7.23b	3.06ab	2.47b	45.88a	46.36b	28.14a	28.42ab	33.98b	34.64b	10.20b	10.74c	1981.35a	2014.03a	3.23c	3.28c	0.607c	0.686c	2.75b	2.74c	0.352b	0.323b
RSM	7.51b	7.16b	0.695b	0.732b	36.33a	36.90a	16.89a	16.82a	266.13b	268.91b	29.63b	29.16b	7.45b	7.49ab	3.15ab	2.31b	46.86a	47.88a	28.89a	29.37a	35.15a	35.70a	11.35a	12.50a	2003.96a	2040.54a	3.51a	3.63a	0.673a	0.761a	2.91a	3.01b	0.349bc	0.319b
SDM	7.40b	7.01c	0.757a	0.786a	35.50ab	36.17ab	16.10a	15.82a	283.55a	284.63a	32.94a	33.55a	7.98a	8.33a	2.40b	1.33c	46.05a	46.65b	28.18a	28.70b	34.38ab	34.90a	10.70ab	11.48b	1991.04a	2025.55a	3.39b	3.55b	0.647b	0.714b	2.89a	3.11a	0.358a	0.326b
Chitosan foliar application
Ch0	7.61a	7.23a	0.659b	0.668b	32.32	32.77b	15.3	15.42	251.03	252.05	31.15	31.58	6.64c	6.66c	3.43	2.86a	40.23c	40.64c	23.92c	24.22c	26.37d	26.93b	7.98c	8.47c	1543.36c	1565.80c	2.74d	2.98d	0.441d	0.494d	2.23d	2.38d	0.499a	0.471a
Ch1	7.47b	7.12ab	0.669ab	0.691ab	33.35	34.03a	14.74	14.74	251.86	253.11	30.87	31.22	7.10b	7.28ab	3.03	2.33b	46.28b	46.85b	28.46b	28.75b	34.68c	36.03a	10.58b	11.24b	1918.59b	1942.63b	3.14c	3.30c	0.588c	0.667c	2.60c	2.72c	0.384b	0.359b
Ch2	7.41bc	7.05bc	0.676ab	0.705ab	33.44	34.14a	14.66	14.61	252.09	253.31	30.72	31.08	7.26ab	7.45ab	2.92	2.15b	45.46ab	46.48b	28.72a	29.09ab	35.44b	36.53a	10.91ab	11.69ab	1933.92b	1977.14b	3.36b	3.41b	0.655b	0.732b	2.81b	2.87b	0.337c	0.306c
Ch3	7.35c	7.00c	0.690a	0.716a	33.59	34.29a	14.55	14.43	252.26	253.71	30.51	30.86	7.31a	7.62a	2.85	2.08b	47.65a	48.21a	28.93a	29.33a	36.59a	36.94a	11.36a	12.20a	2030.93a	2075.77a	3.53a	3.53a	0.705a	0.793a	2.96a	2.97a	0.298c	0.268c
Interaction
UNM Ch0	7.89a	7.78	0.588	0.555	26.44	24.39	12.93	12.52	200.64	199.79	27.37	28.19	5.21h	4.75	4.07	3.92	37.3	37.4	21.7	21.87	22.8	23.37	6.52	6.71	1135.43	1167.8	2.06l	2.12l	0.316i	0.326m	1.48k	1.50k	0.648a	0.625a
UNM Ch1	7.77ab	7.61	0.599	0.601	27.43	28.52	12.5	12.41	201.28	201.65	27.13	27.87	6.09g	6.19	3.53	3.28	42	42.3	25.33	25.4	30.37	31.01	8.75	9.02	1513.68	1518.44	2.63k	2.84k	0.477j	0.557k	2.14j	2.21j	0.433c	0.407b
UNM Ch2	7.72abc	7.53	0.607	0.638	27.55	28.58	12.48	12.32	201.3	201.87	27.06	27.87	6.17g	6.32	3.49	3.07	40.4	41.9	25.86	25.93	31.69	32.55	9.21	9.6	1534.62	1559.07	2.88i	2.96j	0.515i	0.596i	2.28i	2.29i	0.400d	0.375c
UNM Ch3	7.69abc	7.49	0.596	0.613	27.61	28.77	12.38	12.29	201.53	202.03	26.98	27.64	6.21g	6.57	3.35	2.98	43.67	43.57	26.33	26.43	33.47	34.08	9.81	10.19	1618.09	1679.64	3.02h	3.11i	0.535h	0.623h	2.35h	2.36i	0.353f	0.331d
WPM Ch0	7.36bcde	6.75	0.625	0.632	32.87	34.2	14.17	14.93	255.7	255.85	33.9	34.54	6.66f	6.8	3.38	3	41.25	41.53	24.43	24.47	27	27.55	7.99	8.35	1674.26	1692.35	2.74j	3.05i	0.437k	0.50l	2.31i	2.44h	0.443bc	0.412b
WPM Ch1	7.16de	6.67	0.638	0.659	33.77	34.64	13.63	14.1	256.31	257.48	33.59	34.22	6.90ef	7.15	3.05	2.42	47.42	47.7	29.23	29.63	35.51	36.25	10.6	11.14	2040.14	2069.96	3.18g	3.22h	0.595g	0.676g	2.68f	2.70g	0.368ef	0.342d
WPM Ch2	7.06de	6.58	0.646	0.665	33.85	34.73	13.5	13.99	256.55	257.7	33.5	33.85	7.10de	7.42	2.92	2.26	46.55	47.53	29.4	29.67	36.06	36.93	10.86	11.51	2056.63	2108.37	3.40e	3.35fg	0.669e	0.745e	2.92d	2.87f	0.316g	0.285e
WPM Ch3	7.04e	6.51	0.665	0.68	33.94	34.85	13.42	13.72	256.87	258.21	33.16	33.92	7.18de	7.53	2.89	2.19	48.28	48.7	29.5	29.9	37.35	37.82	11.35	11.96	2154.38	2185.48	3.59c	3.49de	0.726c	0.815c	3.08b	2.97e	0.283h	0.251f
RSM Ch0	7.66abc	7.31	0.685	0.719	35.39	36.53	17.33	17.73	264.45	268.62	30.13	29.64	7.03def	7.09	3.48	2.92	41.38	42.04	25.07	25.6	28.47	29.06	9.06	9.91	1685.68	1694.87	3.15g	3.43ef	0.515i	0.577j	2.60g	2.74g	0.450b	0.420b
RSM Ch1	7.53abcd	7.19	0.694	0.723	36.47	36.93	16.89	16.56	266.35	268.76	29.81	29.1	7.37cd	7.45	3.11	2.18	48.08	49.17	30	30.27	36.85	37.26	11.83	12.91	2070.6	2101.06	3.44de	3.60c	0.652e	0.743e	2.80e	2.94e	0.363ef	0.339d
RSM Ch2	7.48abcde	7.1	0.696	0.733	36.62	37.01	16.71	16.52	266.86	268.92	29.43	29.06	7.65bc	7.64	3.04	2.09	48.04	49.04	30.17	30.7	37.32	37.77	12.1	13.3	2072.2	2131.53	3.64bc	3.72b	0.731c	0.825bc	3.04bc	3.12c	0.311g	0.277e
RSM Ch3	7.38bcde	7.05	0.704	0.752	36.86	37.15	16.63	16.44	266.86	269.35	29.16	28.85	7.74abc	7.79	2.97	2.05	49.94	51.27	30.33	30.9	37.95	38.73	12.43	13.87	2187.39	2234.65	3.81a	3.79a	0.795a	0.898a	3.21a	3.23b	0.273h	0.241f
SDM Ch0	7.52abcde	7.09	0.739	0.76	34.58	35.97	16.76	16.51	283.32	283.92	33.19	33.94	7.65bc	8.01	2.78	1.61	41	41.6	24.47	24.93	27.21	27.75	8.34	8.91	1678.07	1708.2	3.03h	3.33g	0.496j	0.564jk	2.55g	2.84f	0.456b	0.427b
SDM Ch1	7.42abcde	7.03	0.743	0.778	35.72	36.06	15.95	15.91	283.49	284.56	32.96	33.7	8.02ab	8.33	2.41	1.43	47.64	48.24	29.27	29.7	36.01	36.46	11.14	11.88	2049.97	2081.07	3.33f	3.55cd	0.626f	0.692f	2.80e	3.04d	0.374e	0.346d
SDM Ch2	7.36bcde	6.98	0.754	0.785	35.75	36.23	15.93	15.61	283.63	284.77	32.87	33.53	8.11a	8.41	2.23	1.18	46.84	47.44	29.43	30.07	36.7	37.35	11.46	12.36	2072.2	2109.63	3.50d	3.60c	0.704d	0.761d	3.00c	3.21b	0.319g	0.285e
SDM Ch3	7.28cde	6.95	0.793	0.818	35.94	36.41	15.76	15.26	283.78	285.25	32.74	33.02	8.13a	8.57	2.18	1.11	48.7	49.3	29.57	30.1	37.59	38.01	11.85	12.77	2163.9	2203.24	3.70b	3.74ab	0.763b	0.837b	3.20a	3.32a	0.282h	0.248f
	*	ns	ns	ns	ns	ns	ns	ns	ns	ns	ns	ns	*	ns	ns	ns	ns	ns	ns	ns	ns	ns	ns	ns	ns	ns	***	***	*	**	***	***	***	***
